# Supplementary material
Source: MDPI journal article supplement (https://www.mdpi.com/2409-515X/7/3/49)
Supplement: s1 [file s1]

Table S1: National Webinars Hosted by the NewSTEPs Short Term Follow-up Workgroup

| Date           | Webinar Topic                                                                                                                                                                                                                |
|----------------|------------------------------------------------------------------------------------------------------------------------------------------------------------------------------------------------------------------------------|
| January 2020   | Establishing and reviewing cut-offs for analysis of new disorders                                                                                                                                                            |
| October 2018   | Emergency Preparedness for Newborn Screening Programs                                                                                                                                                                        |
| May 2018       | Recap of In-Person Meeting                                                                                                                                                                                                   |
| March 2018     | Collaborating with Families & Providers in Community Birth Settings                                                                                                                                                          |
| January 2018   | HIPAA Issues in Newborn Screening                                                                                                                                                                                            |
| November 2017  | Family Experiences with Short Term Follow Up                                                                                                                                                                                 |
| September 2017 | Spinal Muscular Atrophy                                                                                                                                                                                                      |
| July 2017      | The Power of Case Studies                                                                                                                                                                                                    |
| May 2017       | Long-term Follow-up Systems and Perspectives                                                                                                                                                                                 |
| March 2017     | Update on CPT1a Deficiency in the Alaska Native Population                                                                                                                                                                   |
| January 2017   | Using Advisory Committees for Newborn Screening Programs                                                                                                                                                                     |
| November 2016  | Take-Aways from the Short Term Follow Up Stakeholders Meeting: False Negative, Co-location of Laboratory and Follow Up, Funding Challenges, Cystic Fibrosis Quality Improvement Meeting                                      |
| September 2016 | Newborn Screening Consultants/Linkage to Care                                                                                                                                                                                |
| July 2016      | Recap of the Cystic Fibrosis meeting/Timeliness in Newborn Screening Consideration for Cystic Fibrosis                                                                                                                       |
| May 2016       | Follow Up for X linked Adrenoleukodystrophy.                                                                                                                                                                                 |
| March 2016     | Using Infographics for Data and Parent Materials                                                                                                                                                                             |
| January 2016   | Hemoglobinopathy Follow-Up                                                                                                                                                                                                   |
| November 2015  | Collaborative Improvement and Innovation Network (CoIIN) for Timeliness in Newborn Screening                                                                                                                                 |
| September 2015 | Reducing Time from Referral to Treatment: Strengthening the Weak Links in the Newborn Screening Chain of Events/Illinois Newborn Screening Quality Improvement Initiatives/Virginia's Newborn Screening Transit Time Project |
| July 2015      | Newborn Screening for Congenital Adrenal Hyperplasia/Multistate Analysis of Single Tests or Routine Second Testing for CAH/Reducing False Positives and False Negatives with 2nd Tier Analysis.                              |
| May 2015       | Improving Short- and Long-term Follow-up Efficiency through Implementation of an Internet Case Management System/Newborn Screening Short Term Follow-Up and the INSTEP Application                                           |
| March 2015     | The Controversy of Mild Congenital Hypothyroidism/Vermont Protocols for Follow-up of Mild Congenital Hypothyroidism/Feasibility of Providing Long Term Follow-Up for Congenital Hypothyroidism                               |

Supplementary File

IJNS- 1273396

Establishing a National Community of Practice for Newborn Screening Follow-Up

|                |                                                                                                                                                                                           |
|----------------|-------------------------------------------------------------------------------------------------------------------------------------------------------------------------------------------|
| January 2015   | Short Term Follow-Up Theme/Non-SCID T Cell Lymphopenias During the First Year of NBS in Washington State/Diagnosis and Short Term Follow-Up of Cases found by TREC NBS/Winter Storm Knife |
| November 2014  | Recap of Symposium Round Table Discussion                                                                                                                                                 |
| September 2014 | Genetics Counselors Enhancing NBS Activities/The Role of a Clinical Genetic Counselor in NBS                                                                                              |
| July 2014      | HIPAA Rule Change/Ethical Implications of Direct to Patient Test Reporting                                                                                                                |
| May 2014       | Electronic Vital Records and Screening System in SD/Genetic Services Short Term Follow-Up in NJ/Matching Vital Records and NBS Data in NYS/ Delaware Missed Babies                        |
| March 2014     | Newborn Screening Education in Texas/A Parent's Perspective on Newborn Screening/Health Information Technology (HIT) Workgroup                                                            |
| January 2014   | The Importance of Identifying False Negatives/Using a Secure Portal (SharePoint) for Communications and Data Collection                                                                   |
| November 2013  | Follow-up of Unsuitable and Borderline Specimens in NYS: When is Enough Enough?                                                                                                           |
